# Supplementary material for: Identification and Functional Analysis of Tomato CIPK Gene Family
Source: PubMed Central journal article supplement (PMC6981861; doi:10.3390/ijms21010110), 2019-12-23
Supplement: ijms-21-00110-s001.pdf [file ijms-21-00110-s001.pdf]

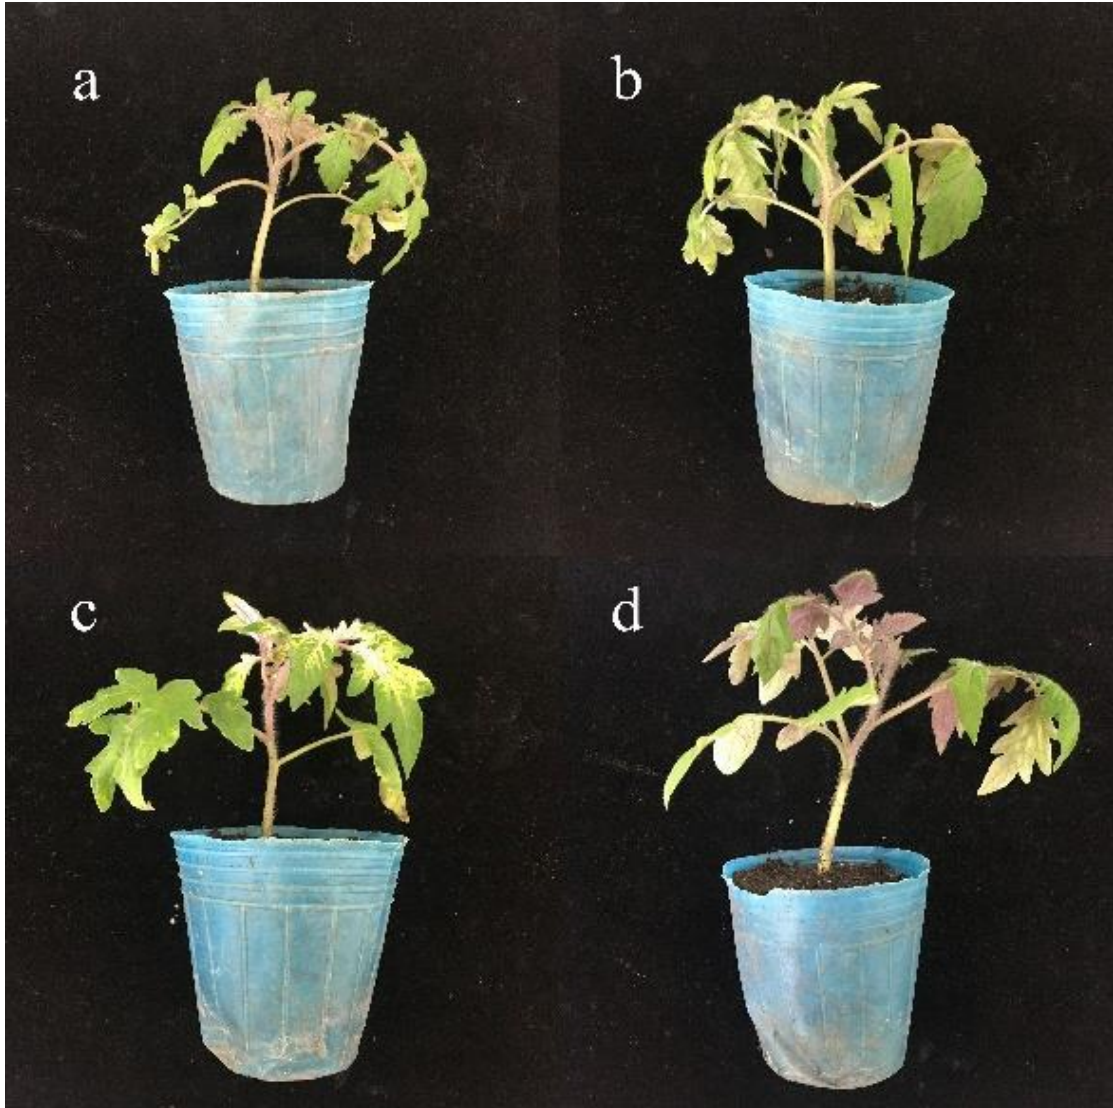

**Supplement Figure 1.** Observation of plant symptoms after virus induced gene silencing (VIGS). **a:** SICIPK1 silenced plant; **b:** SICIPK8 silenced plant; **c:** PDS silenced plant; **d:** control.

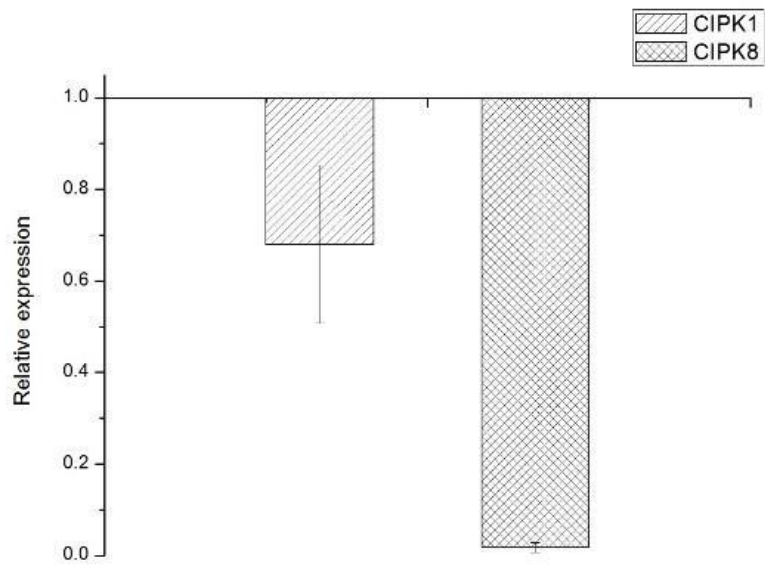

**Supplement Figure 2.** Detection of gene expression after virus induced gene silencing (VIGS).

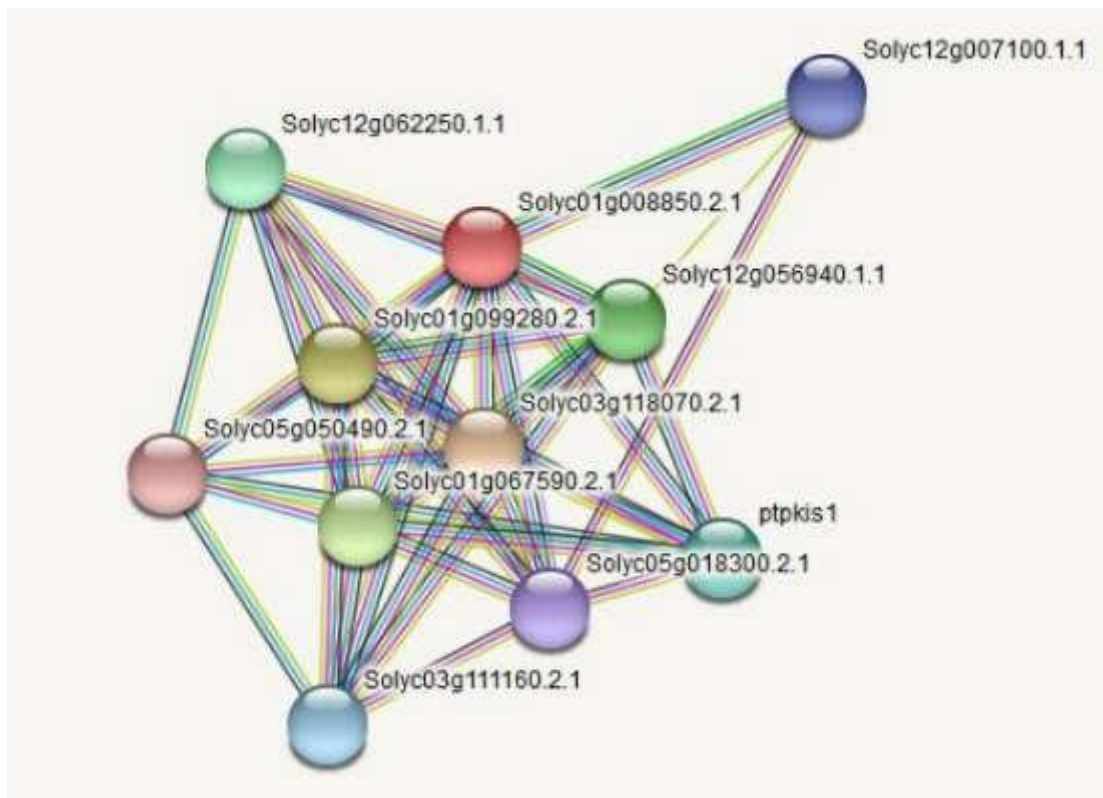

**Supplement figure 3.** Prediction of protein network interactivity of SICIPK1 protein.

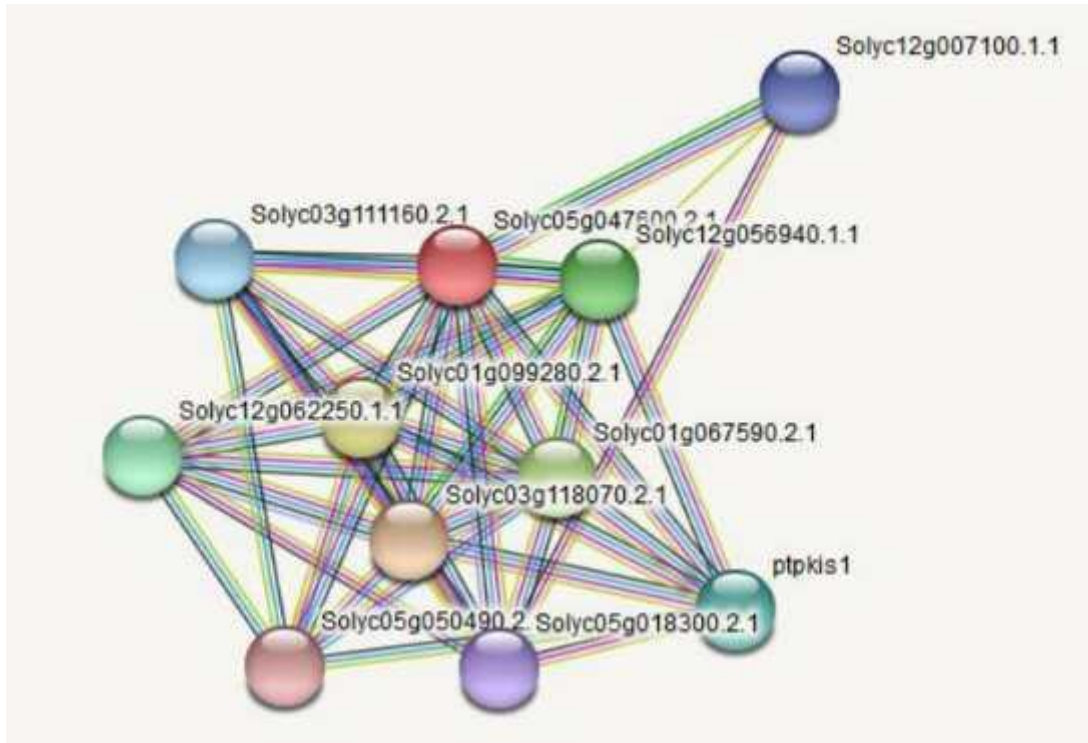

**Supplement figure 4.** Prediction of protein network interactivity of SICIPK8 protein.

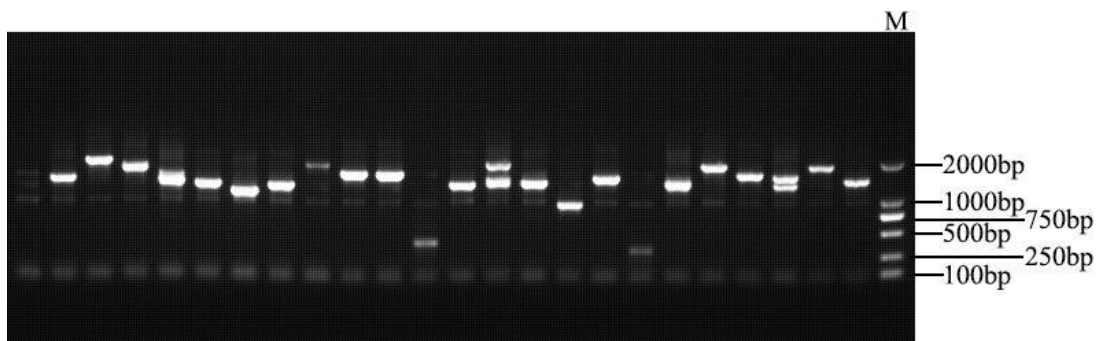

**Supplement figure 5.** Recombination rate of the yeast library insert fragment.
